# Supplementary material for: Differentially Expressed Wound Healing-Related microRNAs in the Human Diabetic Cornea
Source: PLoS One. 2013 Dec 20;8(12):e84425. doi: 10.1371/journal.pone.0084425 (PMC3869828; doi:10.1371/journal.pone.0084425)
Supplement: Table S1 — List of expressed miRNAs in human cornea using microarray analysis. A total of 196 miRNA gene families (254 miRNAs) were identified as expressed in at least two or more of the central corneas. (DOCX) [file pone.0084425.s001.docx]

Table S1. List of expressed miRNAs in human cornea using microarray analysis

| MiRNA |
| --- |
| | hsa-let-7b | | --- | | hsa-let-7d | | hsa-let-7g | | hsa-let-7i | | hsa-mir-100 | | hsa-mir-101-1 // hsa-mir-101-2 | | hsa-mir-103-2 // hsa-mir-103-1 | | hsa-mir-106a | | hsa-mir-106b | | hsa-mir-107 | | hsa-mir-10a | | hsa-mir-1180 | | hsa-mir-1184 // hsa-mir-1184 // hsa-mir-1184 | | hsa-mir-1201 | | hsa-mir-1202 | | hsa-mir-1207 | | hsa-mir-1224 | | hsa-mir-1225 | | hsa-mir-1228 | | hsa-mir-1231 | | hsa-mir-124-3 // hsa-mir-124-2 // hsa-mir-124-1 | | hsa-mir-1246 | | hsa-mir-125a | | hsa-mir-125b-1 // hsa-mir-125b-2 | | hsa-mir-126 | | hsa-mir-1260 | | hsa-mir-1262 | | hsa-mir-1263 | | hsa-mir-1267 | | hsa-mir-1268 | | hsa-mir-127 | | hsa-mir-1270 | | hsa-mir-1271 | | hsa-mir-1272 | | hsa-mir-1274b | | hsa-mir-1275 | | hsa-mir-128-1 // hsa-mir-128-2 | | hsa-mir-1280 | | hsa-mir-1281 | | hsa-mir-1285-2 // hsa-mir-1285-1 | | hsa-mir-1287 | | hsa-mir-1288 | | hsa-mir-129-2 // hsa-mir-129-1 | | hsa-mir-1290 | | hsa-mir-1291 | | hsa-mir-1299 | | hsa-mir-1300 | | hsa-mir-1301 | | hsa-mir-1303 | | hsa-mir-1307 | | hsa-mir-1308 | | hsa-mir-130a | | hsa-mir-130b | | hsa-mir-132 | | hsa-mir-1323 | | hsa-mir-134 | | hsa-mir-135a-2 // hsa-mir-135a-1 | | hsa-mir-135b | | hsa-mir-138-2 // hsa-mir-138-1 | | hsa-mir-139 | | hsa-mir-140 | | hsa-mir-141 | | hsa-mir-143 | | hsa-mir-144 | | hsa-mir-145 | | hsa-mir-146a | | hsa-mir-146b | | hsa-mir-148a | | hsa-mir-148b | | hsa-mir-149 | | hsa-mir-150 | | hsa-mir-151 | | hsa-mir-152 | | hsa-mir-155 | | hsa-mir-15a | | hsa-mir-15b | | hsa-mir-16-1 // hsa-mir-16-2 | | hsa-mir-17 | | hsa-mir-181a-1 // hsa-mir-181a-2 | | hsa-mir-181b-1 // hsa-mir-181b-2 | | hsa-mir-181c | | hsa-mir-181d | | hsa-mir-182 | | hsa-mir-1825 | | hsa-mir-1826 | | hsa-mir-183 | | hsa-mir-184 | | hsa-mir-185 | | hsa-mir-188 | | hsa-mir-18a | | hsa-mir-18b | | hsa-mir-191 | | hsa-mir-192 | | hsa-mir-193a | | hsa-mir-193b | | hsa-mir-194-2 // hsa-mir-194-1 | | hsa-mir-195 | | hsa-mir-196a-2 // hsa-mir-196a-1 | | hsa-mir-197 | | hsa-mir-198 | | hsa-mir-199a-1 // hsa-mir-199a-2 | | hsa-mir-199b | | hsa-mir-19a | | hsa-mir-19b-1 // hsa-mir-19b-2 | | hsa-mir-200a | | hsa-mir-200b | | hsa-mir-200b | | hsa-mir-200c | | hsa-mir-203 | | hsa-mir-204 | | hsa-mir-205 | | hsa-mir-20a | | hsa-mir-20b | | hsa-mir-21 | | hsa-mir-210 | | hsa-mir-212 | | hsa-mir-214 | | hsa-mir-22 | | hsa-mir-220c | | hsa-mir-221 | | hsa-mir-221 | | hsa-mir-222 | | hsa-mir-223 | | hsa-mir-23a | | hsa-mir-23b | | hsa-mir-24-2 // hsa-mir-24-1 | | hsa-mir-25 | | hsa-mir-26a-2 // hsa-mir-26a-1 | | hsa-mir-26b | | hsa-mir-27a | | hsa-mir-27b | | hsa-mir-28 | | hsa-mir-296 | | hsa-mir-297 | | hsa-mir-29a | | hsa-mir-29b-2 // hsa-mir-29b-1 | | hsa-mir-29c | | hsa-mir-301a | | hsa-mir-30a | | hsa-mir-30b | | hsa-mir-30c-1 // hsa-mir-30c-2 | | hsa-mir-30d | | hsa-mir-30e | | hsa-mir-31 | | hsa-mir-32 | | hsa-mir-320a | | hsa-mir-320d-1 // hsa-mir-320d-2 | | hsa-mir-324 | | hsa-mir-328 | | hsa-mir-330 | | hsa-mir-331 | | hsa-mir-335 | | hsa-mir-338 | | hsa-mir-339 | | hsa-mir-342 | | hsa-mir-345 | | hsa-mir-346 | | hsa-mir-34a | | hsa-mir-34b | | hsa-mir-34c | | hsa-mir-361 | | hsa-mir-362 | | hsa-mir-372 | | hsa-mir-374b | | hsa-mir-375 | | hsa-mir-376a-2 // hsa-mir-376a-1 | | hsa-mir-376c | | hsa-mir-378 | | hsa-mir-379 | | hsa-mir-382 | | hsa-mir-409 | | hsa-mir-421 | | hsa-mir-422a | | hsa-mir-423 | | hsa-mir-424 | | hsa-mir-425 | | hsa-mir-429 | | hsa-mir-432 | | hsa-mir-451 | | hsa-mir-454 | | hsa-mir-455 | | hsa-mir-483 | | hsa-mir-486 | | hsa-mir-487b | | hsa-mir-488 | | hsa-mir-489 | | hsa-mir-491 | | hsa-mir-494 | | hsa-mir-497 | | hsa-mir-500 | | hsa-mir-501 | | hsa-mir-502 | | hsa-mir-503 | | hsa-mir-504 | | hsa-mir-505 | | hsa-mir-508 | | hsa-mir-509-2 // hsa-mir-509-3 // hsa-mir-509-1 | | hsa-mir-509-3 | | hsa-mir-510 | | hsa-mir-532 | | hsa-mir-548a-2 // hsa-mir-548a-1 // hsa-mir-548a-3 | | hsa-mir-548p | | hsa-mir-550-1 // hsa-mir-550-2 | | hsa-mir-551b | | hsa-mir-559 | | hsa-mir-570 | | hsa-mir-574 | | hsa-mir-584 | | hsa-mir-589 | | hsa-mir-593 | | hsa-mir-595 | | hsa-mir-603 | | hsa-mir-606 | | hsa-mir-615 | | hsa-mir-625 | | hsa-mir-626 | | hsa-mir-627 | | hsa-mir-628 | | hsa-mir-629 | | hsa-mir-635 | | hsa-mir-638 | | hsa-mir-652 | | hsa-mir-658 | | hsa-mir-660 | | hsa-mir-663 | | hsa-mir-664 | | hsa-mir-665 | | hsa-mir-671 | | hsa-mir-675 | | hsa-mir-708 | | hsa-mir-720 | | hsa-mir-744 | | hsa-mir-768 | | hsa-mir-769 | | hsa-mir-874 | | hsa-mir-877 | | hsa-mir-885 | | hsa-mir-886 | | hsa-mir-921 | | hsa-mir-923 | | hsa-mir-92a-1 // hsa-mir-92a-2 | | hsa-mir-92b | | hsa-mir-93 | | hsa-mir-933 | | hsa-mir-934 | | hsa-mir-935 | | hsa-mir-936 | | hsa-mir-938 | | hsa-mir-939 | | hsa-mir-943 | | hsa-mir-96 | | hsa-mir-98 | | hsa-mir-99a | | hsa-mir-99b | |
